# Supplementary material for: GWASinlps: non-local prior based iterative SNP selection tool for genome-wide association studies
Source: Oxford University Press journal article supplement (doi:10.1093/bioinformatics/bty472), 2018-06-12
Supplement: bioinformatics_35_1_1_s1.pdf [file bioinformatics_35_1_1_s1.pdf]

Supplementary materials to “GWASinlps: Nonlocal  
prior based iterative SNP selection tool for  
genome-wide association studies” by Nilotpall Sanyal,  
Min-Tzu Lo, Karolina Kauppi, Srdjan Djurovic, Ole A.  
Andreassen, Valen E. Johnson, Chi-Hua Chen

Supplementary Table 1: True positive rate (TPR) of variable selection for Simulation 1 datasets with number of real genotyped SNPs  $p = (10000, 15000, 2000)$ , sample size  $n = (2000, 3000, 5000)$ , and heritability  $h^2 = (0.1, 0.2, 0.3, 0.4, 0.5)$ , analyzed using GWASinlps pMOM method ( $\tau = 0.022$ ,  $k_0 = 1$ ,  $r_{xx} = 0.2$ ), GWASinlps piMOM method ( $\tau = 0.008$ ,  $k_0 = 1$ ,  $r_{xx} = 0.2$ ), Zellner’s g-prior based method within our structured screen-and-select framework, LASSO ( $\lambda = 1.1se$ ), Elastic Net ( $\lambda = 1.1se$ ,  $\alpha = 0.75, 0.5, 0.25$ ), and pi-MASS. For GWASinlps SNP selection, 1,800 MCMC iterations were used after 200 burn-ins, whereas for pi-MASS 10,000 iterations were used after 1,000 burn-ins. For Zellner prior  $g = n$  was used. All the figures are averaged over 100 replicates.

|       |              | $h^2=0.1$ |      |       | $h^2=0.2$ |      |       | $h^2=0.3$ |       |       | $h^2=0.4$ |       |      | $h^2=0.5$ |       |       |
|-------|--------------|-----------|------|-------|-----------|------|-------|-----------|-------|-------|-----------|-------|------|-----------|-------|-------|
|       |              | n=2K      | n=3K | n=5K  | n=2K      | n=3K | n=5K  | n=2K      | n=3K  | n=5K  | n=2K      | n=3K  | n=5K | n=2K      | n=3K  | n=5K  |
| p=10K | pi-MASS      | 0.05      | 0.05 | 0.05  | 0.15      | 0.15 | 0.1   | 0.2       | 0.2   | 0.175 | 0.25      | 0.25  | 0.2  | 0.3       | 0.3   | 0.25  |
|       | LASSO min    | 0.3       | 0.3  | 0.325 | 0.45      | 0.5  | 0.45  | 0.55      | 0.6   | 0.6   | 0.6       | 0.675 | 0.65 | 0.65      | 0.7   | 0.7   |
|       | LASSO 1se    | 0.2       | 0.15 | 0.15  | 0.35      | 0.35 | 0.35  | 0.45      | 0.5   | 0.5   | 0.55      | 0.6   | 0.6  | 0.6       | 0.675 | 0.65  |
|       | EN 0.075 min | 0.3       | 0.3  | 0.325 | 0.45      | 0.5  | 0.5   | 0.55      | 0.6   | 0.6   | 0.6       | 0.7   | 0.65 | 0.65      | 0.7   | 0.7   |
|       | EN 0.075 1se | 0.15      | 0.15 | 0.15  | 0.35      | 0.35 | 0.375 | 0.45      | 0.5   | 0.5   | 0.55      | 0.6   | 0.6  | 0.6       | 0.7   | 0.65  |
|       | EN 0.050 min | 0.35      | 0.3  | 0.35  | 0.45      | 0.5  | 0.5   | 0.55      | 0.6   | 0.6   | 0.65      | 0.7   | 0.65 | 0.7       | 0.75  | 0.7   |
|       | EN 0.050 1se | 0.15      | 0.15 | 0.15  | 0.35      | 0.35 | 0.4   | 0.5       | 0.5   | 0.5   | 0.55      | 0.6   | 0.6  | 0.65      | 0.7   | 0.65  |
|       | EN 0.025 min | 0.35      | 0.3  | 0.35  | 0.5       | 0.5  | 0.5   | 0.575     | 0.65  | 0.6   | 0.65      | 0.7   | 0.65 | 0.7       | 0.75  | 0.7   |
|       | EN 0.025 1se | 0.2       | 0.2  | 0.15  | 0.4       | 0.4  | 0.4   | 0.5       | 0.525 | 0.55  | 0.6       | 0.65  | 0.6  | 0.65      | 0.7   | 0.7   |
|       | zellner      | 0.2       | 0.2  | 0.2   | 0.3       | 0.3  | 0.35  | 0.4       | 0.45  | 0.45  | 0.5       | 0.6   | 0.55 | 0.55      | 0.65  | 0.6   |
|       | pMOM         | 0.2       | 0.2  | 0.25  | 0.3       | 0.35 | 0.35  | 0.4       | 0.5   | 0.45  | 0.5       | 0.6   | 0.55 | 0.55      | 0.65  | 0.6   |
| piMOM | 0.2          | 0.2       | 0.25 | 0.3   | 0.35      | 0.35 | 0.4   | 0.5       | 0.45  | 0.5   | 0.6       | 0.55  | 0.6  | 0.65      | 0.65  |       |
| p=15K | pi-MASS      | 0.1       | 0.1  | 0.05  | 0.15      | 0.2  | 0.15  | 0.2       | 0.3   | 0.15  | 0.25      | 0.3   | 0.2  | 0.25      | 0.35  | 0.25  |
|       | LASSO min    | 0.3       | 0.45 | 0.35  | 0.45      | 0.6  | 0.55  | 0.5       | 0.7   | 0.6   | 0.55      | 0.75  | 0.7  | 0.6       | 0.75  | 0.7   |
|       | LASSO 1se    | 0.25      | 0.3  | 0.25  | 0.35      | 0.45 | 0.45  | 0.45      | 0.6   | 0.55  | 0.5       | 0.65  | 0.65 | 0.55      | 0.75  | 0.7   |
|       | EN 0.075 min | 0.3       | 0.45 | 0.35  | 0.45      | 0.6  | 0.55  | 0.5       | 0.7   | 0.6   | 0.6       | 0.75  | 0.7  | 0.65      | 0.75  | 0.7   |
|       | EN 0.075 1se | 0.25      | 0.3  | 0.25  | 0.35      | 0.5  | 0.45  | 0.45      | 0.6   | 0.55  | 0.55      | 0.7   | 0.65 | 0.6       | 0.75  | 0.7   |
|       | EN 0.050 min | 0.35      | 0.45 | 0.4   | 0.45      | 0.6  | 0.55  | 0.55      | 0.7   | 0.625 | 0.6       | 0.75  | 0.7  | 0.65      | 0.75  | 0.7   |
|       | EN 0.050 1se | 0.25      | 0.3  | 0.25  | 0.4       | 0.5  | 0.475 | 0.5       | 0.6   | 0.6   | 0.55      | 0.7   | 0.65 | 0.65      | 0.75  | 0.7   |
|       | EN 0.025 min | 0.35      | 0.45 | 0.4   | 0.5       | 0.6  | 0.55  | 0.6       | 0.7   | 0.65  | 0.65      | 0.75  | 0.7  | 0.7       | 0.75  | 0.75  |
|       | EN 0.025 1se | 0.3       | 0.3  | 0.3   | 0.4       | 0.5  | 0.5   | 0.5       | 0.6   | 0.6   | 0.6       | 0.7   | 0.65 | 0.65      | 0.75  | 0.7   |
|       | zellner      | 0.2       | 0.3  | 0.25  | 0.3       | 0.4  | 0.4   | 0.4       | 0.55  | 0.5   | 0.45      | 0.65  | 0.6  | 0.5       | 0.7   | 0.65  |
|       | pMOM         | 0.2       | 0.3  | 0.25  | 0.3       | 0.45 | 0.4   | 0.4       | 0.55  | 0.5   | 0.45      | 0.65  | 0.6  | 0.5       | 0.7   | 0.65  |
| piMOM | 0.2          | 0.3       | 0.25 | 0.3   | 0.45      | 0.4  | 0.4   | 0.55      | 0.5   | 0.45  | 0.65      | 0.6   | 0.5  | 0.7       | 0.7   |       |
| p=20K | pi-MASS      | 0.15      | 0.15 | 0.1   | 0.2       | 0.25 | 0.2   | 0.25      | 0.3   | 0.2   | 0.3       | 0.35  | 0.25 | 0.35      | 0.4   | 0.275 |
|       | LASSO min    | 0.4       | 0.5  | 0.5   | 0.5       | 0.65 | 0.65  | 0.6       | 0.7   | 0.7   | 0.65      | 0.7   | 0.75 | 0.7       | 0.75  | 0.75  |
|       | LASSO 1se    | 0.35      | 0.4  | 0.35  | 0.45      | 0.6  | 0.55  | 0.55      | 0.65  | 0.65  | 0.6       | 0.7   | 0.7  | 0.65      | 0.75  | 0.75  |
|       | EN 0.075 min | 0.425     | 0.5  | 0.5   | 0.55      | 0.65 | 0.65  | 0.6       | 0.7   | 0.7   | 0.65      | 0.7   | 0.75 | 0.7       | 0.75  | 0.75  |
|       | EN 0.075 1se | 0.35      | 0.4  | 0.35  | 0.475     | 0.6  | 0.6   | 0.55      | 0.65  | 0.65  | 0.6       | 0.7   | 0.7  | 0.65      | 0.75  | 0.75  |
|       | EN 0.050 min | 0.45      | 0.55 | 0.5   | 0.55      | 0.65 | 0.65  | 0.65      | 0.7   | 0.7   | 0.7       | 0.75  | 0.75 | 0.75      | 0.75  | 0.75  |
|       | EN 0.050 1se | 0.35      | 0.4  | 0.35  | 0.5       | 0.6  | 0.6   | 0.6       | 0.65  | 0.65  | 0.65      | 0.7   | 0.7  | 0.7       | 0.75  | 0.75  |
|       | EN 0.025 min | 0.45      | 0.55 | 0.5   | 0.6       | 0.65 | 0.65  | 0.65      | 0.7   | 0.7   | 0.7       | 0.75  | 0.75 | 0.75      | 0.75  | 0.75  |
|       | EN 0.025 1se | 0.35      | 0.4  | 0.35  | 0.55      | 0.6  | 0.6   | 0.65      | 0.65  | 0.675 | 0.7       | 0.7   | 0.7  | 0.75      | 0.75  | 0.75  |
|       | zellner      | 0.3       | 0.4  | 0.35  | 0.4       | 0.6  | 0.55  | 0.5       | 0.65  | 0.65  | 0.55      | 0.7   | 0.7  | 0.55      | 0.75  | 0.75  |
|       | pMOM         | 0.3       | 0.4  | 0.35  | 0.4       | 0.55 | 0.55  | 0.475     | 0.65  | 0.65  | 0.55      | 0.7   | 0.7  | 0.55      | 0.7   | 0.75  |
| piMOM | 0.3          | 0.4       | 0.35 | 0.4   | 0.575     | 0.55 | 0.5   | 0.65      | 0.65  | 0.55  | 0.7       | 0.7   | 0.55 | 0.75      | 0.75  |       |

Supplementary Table 2: False discovery rate (FDR) of variable selection for Simulation 1 datasets with number of real genotyped SNPs  $p = (10000, 15000, 2000)$ , sample size  $n = (2000, 3000, 5000)$ , and heritability  $h^2 = (0.1, 0.2, 0.3, 0.4, 0.5)$ , analyzed using GWASinlps pMOM method ( $\tau = 0.022$ ,  $k_0 = 1$ ,  $r_{xx} = 0.2$ ), GWASinlps piMOM method ( $\tau = 0.008$ ,  $k_0 = 1$ ,  $r_{xx} = 0.2$ ), Zellner’s g-prior based method within our structured screen-and-select framework, LASSO ( $\lambda = 1.1se$ ), Elastic Net ( $\lambda = 1.1se$ ,  $\alpha = 0.75, 0.5, 0.25$ ), and pi-MASS. For GWASinlps SNP selection, 1,800 MCMC iterations were used after 200 burn-ins, whereas for pi-MASS 10,000 iterations were used after 1,000 burn-ins. For Zellner prior  $g = n$  was used. All the figures are averaged over 100 replicates.

|       |              | $h^2=0.1$ |        |        | $h^2=0.2$ |        |        | $h^2=0.3$ |        |        | $h^2=0.4$ |        |        | $h^2=0.5$ |        |        |
|-------|--------------|-----------|--------|--------|-----------|--------|--------|-----------|--------|--------|-----------|--------|--------|-----------|--------|--------|
|       |              | n=2K      | n=3K   | n=5K   |
| p=10K | pi-MASS      | 0.5       | 0.6    | 0.6    | 0.3333    | 0.4286 | 0.5    | 0.2222    | 0.25   | 0.3333 | 0.2       | 0.2361 | 0.25   | 0.1429    | 0.2222 | 0.2361 |
|       | LASSO min    | 0.8947    | 0.8978 | 0.8951 | 0.8854    | 0.8856 | 0.8804 | 0.883     | 0.8781 | 0.8796 | 0.8879    | 0.8756 | 0.8788 | 0.8815    | 0.8755 | 0.879  |
|       | LASSO 1se    | 0.5       | 0.3333 | 0.2    | 0.6132    | 0.5279 | 0.4118 | 0.6414    | 0.5455 | 0.4721 | 0.6609    | 0.56   | 0.4791 | 0.6667    | 0.5646 | 0.5086 |
|       | EN 0.075 min | 0.9022    | 0.9039 | 0.888  | 0.8969    | 0.8896 | 0.8947 | 0.895     | 0.8802 | 0.8926 | 0.8957    | 0.8832 | 0.8829 | 0.8922    | 0.8865 | 0.8871 |
|       | EN 0.075 1se | 0.5278    | 0.375  | 0.25   | 0.6396    | 0.5132 | 0.4167 | 0.691     | 0.5918 | 0.5228 | 0.7066    | 0.6066 | 0.5298 | 0.7078    | 0.6301 | 0.5437 |
|       | EN 0.050 min | 0.9091    | 0.9079 | 0.9    | 0.9024    | 0.8991 | 0.9043 | 0.9084    | 0.8899 | 0.9039 | 0.9084    | 0.8923 | 0.9004 | 0.9056    | 0.8983 | 0.8983 |
|       | EN 0.050 1se | 0.5714    | 0.4    | 0.3333 | 0.7019    | 0.5882 | 0.5    | 0.75      | 0.644  | 0.5918 | 0.7676    | 0.675  | 0.6268 | 0.7818    | 0.6967 | 0.6301 |
|       | EN 0.025 min | 0.9231    | 0.92   | 0.9151 | 0.9285    | 0.9164 | 0.9179 | 0.9281    | 0.9172 | 0.9231 | 0.9286    | 0.9159 | 0.9267 | 0.9288    | 0.9233 | 0.9302 |
|       | EN 0.025 1se | 0.7101    | 0.5    | 0.4143 | 0.8052    | 0.6927 | 0.633  | 0.83      | 0.7436 | 0.697  | 0.8466    | 0.7749 | 0.75   | 0.8556    | 0.7969 | 0.7819 |
|       | zellner      | 0.4       | 0.4286 | 0.375  | 0.3636    | 0.3    | 0.3205 | 0.3333    | 0.25   | 0.2697 | 0.3077    | 0.2    | 0.25   | 0.2583    | 0.1429 | 0.1875 |
|       | pMOM         | 0.5       | 0.5    | 0.4286 | 0.4       | 0.375  | 0.3636 | 0.3604    | 0.3077 | 0.3101 | 0.3333    | 0.2426 | 0.2941 | 0.2857    | 0.1875 | 0.2667 |
| piMOM | 0.5          | 0.5       | 0.4286 | 0.4167 | 0.4       | 0.4083 | 0.3571 | 0.3529    | 0.3604 | 0.3333 | 0.2667    | 0.3333 | 0.2941 | 0.2353    | 0.2941 |        |
| p=15K | pi-MASS      | 0.5       | 0.5    | 0.75   | 0.3333    | 0.2857 | 0.5714 | 0.2679    | 0.25   | 0.5    | 0.25      | 0.2    | 0.4286 | 0.2111    | 0.1818 | 0.375  |
|       | LASSO min    | 0.8993    | 0.8784 | 0.9038 | 0.8929    | 0.8667 | 0.8925 | 0.891     | 0.8673 | 0.8866 | 0.8856    | 0.8654 | 0.881  | 0.8797    | 0.8707 | 0.8893 |
|       | LASSO 1se    | 0.625     | 0.2857 | 0.4    | 0.6667    | 0.3923 | 0.5263 | 0.6667    | 0.4545 | 0.5652 | 0.6765    | 0.4564 | 0.5667 | 0.6667    | 0.4807 | 0.582  |
|       | EN 0.075 min | 0.9028    | 0.8827 | 0.908  | 0.8994    | 0.8763 | 0.9026 | 0.8957    | 0.8796 | 0.8968 | 0.8925    | 0.879  | 0.8926 | 0.8923    | 0.877  | 0.8939 |
|       | EN 0.075 1se | 0.6667    | 0.3333 | 0.4444 | 0.7048    | 0.4667 | 0.5612 | 0.7312    | 0.5209 | 0.6071 | 0.726     | 0.542  | 0.6192 | 0.7282    | 0.5588 | 0.64   |
|       | EN 0.050 min | 0.9128    | 0.8929 | 0.9135 | 0.9035    | 0.8889 | 0.9068 | 0.9043    | 0.8861 | 0.9078 | 0.9       | 0.8919 | 0.9032 | 0.9043    | 0.8889 | 0.9067 |
|       | EN 0.050 1se | 0.7222    | 0.3693 | 0.5    | 0.7568    | 0.5    | 0.6    | 0.77      | 0.603  | 0.685  | 0.78      | 0.625  | 0.6842 | 0.7818    | 0.6283 | 0.7111 |
|       | EN 0.025 min | 0.9253    | 0.9082 | 0.9304 | 0.9212    | 0.9106 | 0.9251 | 0.9235    | 0.9135 | 0.9281 | 0.9226    | 0.9167 | 0.9308 | 0.9215    | 0.9229 | 0.9321 |
|       | EN 0.025 1se | 0.7778    | 0.4641 | 0.6172 | 0.8248    | 0.6552 | 0.7179 | 0.8333    | 0.7222 | 0.7692 | 0.8378    | 0.7544 | 0.7951 | 0.8471    | 0.7786 | 0.8148 |
|       | zellner      | 0.4444    | 0.2857 | 0.3333 | 0.4       | 0.2    | 0.3038 | 0.3846    | 0.1667 | 0.2941 | 0.3798    | 0.1765 | 0.233  | 0.3529    | 0.1381 | 0.1875 |
|       | pMOM         | 0.4773    | 0.2929 | 0.3875 | 0.4444    | 0.2265 | 0.3333 | 0.4167    | 0.1938 | 0.3077 | 0.4       | 0.2    | 0.25   | 0.3571    | 0.1765 | 0.199  |
| piMOM | 0.5          | 0.3333    | 0.4444 | 0.4615 | 0.2727    | 0.3846 | 0.433  | 0.25      | 0.3431 | 0.4059 | 0.2426    | 0.2941 | 0.3889 | 0.199     | 0.2426 |        |
| p=20K | pi-MASS      | 0.4143    | 0.3333 | 0.5556 | 0.3333    | 0.25   | 0.4286 | 0.2857    | 0.2222 | 0.375  | 0.2792    | 0.2222 | 0.3636 | 0.25      | 0.1938 | 0.3333 |
|       | LASSO min    | 0.9018    | 0.8807 | 0.8799 | 0.8918    | 0.886  | 0.871  | 0.8906    | 0.8803 | 0.8721 | 0.8848    | 0.881  | 0.8766 | 0.8803    | 0.8828 | 0.8735 |
|       | LASSO 1se    | 0.5       | 0.3    | 0.4    | 0.5918    | 0.381  | 0.4444 | 0.6429    | 0.4091 | 0.48   | 0.625     | 0.4583 | 0.5    | 0.6286    | 0.4907 | 0.5081 |
|       | EN 0.075 min | 0.899     | 0.8869 | 0.8894 | 0.8969    | 0.8841 | 0.8804 | 0.8938    | 0.8863 | 0.8876 | 0.8893    | 0.8905 | 0.8839 | 0.8885    | 0.8938 | 0.8881 |
|       | EN 0.075 1se | 0.5625    | 0.3333 | 0.4365 | 0.6414    | 0.4286 | 0.5    | 0.6765    | 0.5    | 0.5333 | 0.6708    | 0.5333 | 0.5625 | 0.6744    | 0.5588 | 0.5632 |
|       | EN 0.050 min | 0.9081    | 0.8921 | 0.9005 | 0.9014    | 0.8982 | 0.8969 | 0.8996    | 0.9048 | 0.8982 | 0.8975    | 0.9043 | 0.9016 | 0.8969    | 0.9047 | 0.9021 |
|       | EN 0.050 1se | 0.622     | 0.3571 | 0.4868 | 0.7027    | 0.52   | 0.5769 | 0.7222    | 0.5667 | 0.6107 | 0.7358    | 0.6329 | 0.65   | 0.7411    | 0.647  | 0.6591 |
|       | EN 0.025 min | 0.917     | 0.9103 | 0.9177 | 0.9184    | 0.9151 | 0.9164 | 0.9188    | 0.9214 | 0.927  | 0.92      | 0.9279 | 0.9276 | 0.9203    | 0.9312 | 0.9319 |
|       | EN 0.025 1se | 0.7       | 0.5263 | 0.5882 | 0.7805    | 0.6325 | 0.6923 | 0.8       | 0.7071 | 0.7407 | 0.8182    | 0.7544 | 0.7699 | 0.8272    | 0.7852 | 0.8027 |
|       | zellner      | 0.3333    | 0.2222 | 0.2361 | 0.3333    | 0.1667 | 0.1938 | 0.3077    | 0.1765 | 0.1429 | 0.2857    | 0.1429 | 0.1765 | 0.2667    | 0.1667 | 0.2105 |
|       | pMOM         | 0.3333    | 0.2222 | 0.25   | 0.3333    | 0.1538 | 0.1875 | 0.3101    | 0.1429 | 0.1429 | 0.2857    | 0.1333 | 0.1765 | 0.2857    | 0.125  | 0.2105 |
| piMOM | 0.375        | 0.25      | 0.2727 | 0.3333 | 0.2       | 0.2143 | 0.3333 | 0.1875    | 0.1875 | 0.3125 | 0.1765    | 0.2105 | 0.3125 | 0.1875    | 0.2222 |        |

Supplementary Table 3: True negative rate (TNR) of variable selection for Simulation 1 datasets with number of real genotyped SNPs  $p = (10000, 15000, 2000)$ , sample size  $n = (2000, 3000, 5000)$ , and heritability  $h^2 = (0.1, 0.2, 0.3, 0.4, 0.5)$ , analyzed using GWASinlps pMOM method ( $\tau = 0.022$ ,  $k_0 = 1$ ,  $r_{xx} = 0.2$ ), GWASinlps piMOM method ( $\tau = 0.008$ ,  $k_0 = 1$ ,  $r_{xx} = 0.2$ ), Zellner’s g-prior based method within our structured screen-and-select framework, LASSO ( $\lambda = 1.1se$ ), Elastic Net ( $\lambda = 1.1se$ ,  $\alpha = 0.75, 0.5, 0.25$ ), and pi-MASS. For GWASinlps SNP selection, 1,800 MCMC iterations were used after 200 burn-ins, whereas for pi-MASS 10,000 iterations were used after 1,000 burn-ins. For Zellner prior  $g = n$  was used. All the figures are averaged over 100 replicates.

|       |              | $h^2=0.1$ |        |        | $h^2=0.2$ |        |        | $h^2=0.3$ |        |        | $h^2=0.4$ |        |        | $h^2=0.5$ |        |        |
|-------|--------------|-----------|--------|--------|-----------|--------|--------|-----------|--------|--------|-----------|--------|--------|-----------|--------|--------|
|       |              | n=2K      | n=3K   | n=5K   |
| p=10K | pi-MASS      | 0.9998    | 0.9999 | 0.9999 | 0.9999    | 0.9999 | 0.9999 | 0.9999    | 0.9999 | 0.9999 | 0.9999    | 0.9999 | 1      | 0.9999    | 0.9999 | 1      |
|       | LASSO min    | 0.995     | 0.9967 | 0.9975 | 0.9928    | 0.9953 | 0.9967 | 0.9919    | 0.9942 | 0.996  | 0.9907    | 0.9938 | 0.9956 | 0.9902    | 0.9936 | 0.9953 |
|       | LASSO 1se    | 0.9997    | 0.9999 | 1      | 0.999     | 0.9995 | 0.9998 | 0.9984    | 0.9992 | 0.9996 | 0.998     | 0.999  | 0.9995 | 0.9977    | 0.9988 | 0.9995 |
|       | EN 0.075 min | 0.9944    | 0.9962 | 0.9975 | 0.9921    | 0.9947 | 0.9963 | 0.9907    | 0.9942 | 0.9955 | 0.9895    | 0.9933 | 0.9953 | 0.9892    | 0.9929 | 0.9951 |
|       | EN 0.075 1se | 0.9996    | 0.9999 | 1      | 0.9988    | 0.9995 | 0.9998 | 0.998     | 0.999  | 0.9995 | 0.9973    | 0.9988 | 0.9994 | 0.997     | 0.9985 | 0.9993 |
|       | EN 0.050 min | 0.9939    | 0.9959 | 0.9973 | 0.9914    | 0.994  | 0.996  | 0.9889    | 0.9936 | 0.995  | 0.9878    | 0.9927 | 0.9944 | 0.9867    | 0.9919 | 0.9944 |
|       | EN 0.050 1se | 0.9995    | 0.9998 | 0.9999 | 0.9983    | 0.9994 | 0.9996 | 0.9972    | 0.9988 | 0.9993 | 0.9963    | 0.9984 | 0.9991 | 0.9956    | 0.998  | 0.999  |
|       | EN 0.025 min | 0.992     | 0.995  | 0.9965 | 0.9873    | 0.9926 | 0.9945 | 0.9853    | 0.9906 | 0.9931 | 0.9831    | 0.9902 | 0.9924 | 0.982     | 0.9887 | 0.9913 |
|       | EN 0.025 1se | 0.9991    | 0.9997 | 0.9999 | 0.9968    | 0.9988 | 0.9993 | 0.9952    | 0.9979 | 0.9989 | 0.9935    | 0.9972 | 0.9983 | 0.9921    | 0.9964 | 0.9978 |
|       | zellner      | 0.9997    | 0.9998 | 0.9999 | 0.9996    | 0.9998 | 0.9999 | 0.9996    | 0.9998 | 0.9999 | 0.9996    | 0.9998 | 0.9998 | 0.9996    | 0.9999 | 0.9999 |
|       | pMOM         | 0.9997    | 0.9998 | 0.9999 | 0.9996    | 0.9997 | 0.9998 | 0.9995    | 0.9997 | 0.9998 | 0.9995    | 0.9997 | 0.9998 | 0.9996    | 0.9998 | 0.9998 |
| piMOM | 0.9996       | 0.9997    | 0.9998 | 0.9996 | 0.9997    | 0.9998 | 0.9995 | 0.9997    | 0.9998 | 0.9995 | 0.9997    | 0.9997 | 0.9995 | 0.9997    | 0.9998 |        |
| p=15K | pi-MASS      | 0.9998    | 0.9999 | 0.9999 | 0.9999    | 0.9999 | 0.9998 | 0.9998    | 0.9999 | 0.9999 | 0.9998    | 0.9999 | 0.9999 | 0.9999    | 0.9999 | 0.9999 |
|       | LASSO min    | 0.9947    | 0.9961 | 0.9969 | 0.9928    | 0.9949 | 0.9958 | 0.9922    | 0.9943 | 0.9956 | 0.9915    | 0.9941 | 0.9954 | 0.9911    | 0.9935 | 0.9948 |
|       | LASSO 1se    | 0.9993    | 0.9999 | 0.9999 | 0.9986    | 0.9996 | 0.9995 | 0.9983    | 0.9994 | 0.9994 | 0.9979    | 0.9993 | 0.9993 | 0.9978    | 0.9992 | 0.9991 |
|       | EN 0.075 min | 0.9941    | 0.9959 | 0.9967 | 0.992     | 0.9945 | 0.9956 | 0.9915    | 0.9937 | 0.9951 | 0.9909    | 0.9933 | 0.9947 | 0.9901    | 0.9931 | 0.9945 |
|       | EN 0.075 1se | 0.9991    | 0.9998 | 0.9998 | 0.9983    | 0.9995 | 0.9995 | 0.9976    | 0.9992 | 0.9992 | 0.9972    | 0.999  | 0.999  | 0.997     | 0.9988 | 0.9989 |
|       | EN 0.050 min | 0.9933    | 0.9951 | 0.9963 | 0.9914    | 0.9937 | 0.9952 | 0.9897    | 0.993  | 0.9942 | 0.9892    | 0.9922 | 0.994  | 0.9879    | 0.9922 | 0.9935 |
|       | EN 0.050 1se | 0.9988    | 0.9997 | 0.9997 | 0.9976    | 0.9994 | 0.9993 | 0.9968    | 0.9988 | 0.9989 | 0.996     | 0.9985 | 0.9987 | 0.9956    | 0.9984 | 0.9984 |
|       | EN 0.025 min | 0.9913    | 0.9943 | 0.9953 | 0.9884    | 0.992  | 0.9938 | 0.9863    | 0.9905 | 0.9925 | 0.985     | 0.9897 | 0.9918 | 0.9839    | 0.9884 | 0.9907 |
|       | EN 0.025 1se | 0.9981    | 0.9997 | 0.9996 | 0.9962    | 0.9988 | 0.9989 | 0.9948    | 0.9979 | 0.9982 | 0.9938    | 0.9973 | 0.9977 | 0.9929    | 0.9966 | 0.9972 |
|       | zellner      | 0.9997    | 0.9999 | 0.9999 | 0.9996    | 0.9999 | 0.9998 | 0.9995    | 0.9999 | 0.9998 | 0.9994    | 0.9998 | 0.9998 | 0.9995    | 0.9999 | 0.9999 |
|       | pMOM         | 0.9996    | 0.9998 | 0.9999 | 0.9996    | 0.9998 | 0.9998 | 0.9995    | 0.9998 | 0.9998 | 0.9994    | 0.9998 | 0.9998 | 0.9994    | 0.9998 | 0.9998 |
| piMOM | 0.9996       | 0.9998    | 0.9998 | 0.9995 | 0.9998    | 0.9998 | 0.9994 | 0.9997    | 0.9998 | 0.9994 | 0.9997    | 0.9998 | 0.9994 | 0.9998    | 0.9998 |        |
| p=20K | pi-MASS      | 0.9998    | 0.9999 | 0.9999 | 0.9998    | 0.9999 | 0.9999 | 0.9998    | 0.9999 | 0.9999 | 0.9998    | 0.9999 | 0.9999 | 0.9998    | 0.9999 | 0.9999 |
|       | LASSO min    | 0.9925    | 0.995  | 0.9965 | 0.9917    | 0.9936 | 0.996  | 0.9907    | 0.9933 | 0.9956 | 0.9907    | 0.9931 | 0.9951 | 0.9904    | 0.9927 | 0.9953 |
|       | LASSO 1se    | 0.9993    | 0.9998 | 0.9998 | 0.9986    | 0.9995 | 0.9996 | 0.9981    | 0.9994 | 0.9995 | 0.998     | 0.9993 | 0.9994 | 0.9979    | 0.9991 | 0.9993 |
|       | EN 0.075 min | 0.992     | 0.9947 | 0.9961 | 0.991     | 0.9934 | 0.9956 | 0.99      | 0.9928 | 0.9949 | 0.9896    | 0.9924 | 0.9948 | 0.9893    | 0.992  | 0.9944 |
|       | EN 0.075 1se | 0.9992    | 0.9997 | 0.9998 | 0.9983    | 0.9994 | 0.9995 | 0.9977    | 0.9992 | 0.9993 | 0.9974    | 0.999  | 0.9992 | 0.9972    | 0.9988 | 0.9991 |
|       | EN 0.050 min | 0.9915    | 0.9941 | 0.9959 | 0.9898    | 0.9925 | 0.9946 | 0.989     | 0.9913 | 0.9944 | 0.9883    | 0.9911 | 0.9936 | 0.9876    | 0.9906 | 0.9935 |
|       | EN 0.050 1se | 0.9988    | 0.9997 | 0.9997 | 0.9976    | 0.9992 | 0.9993 | 0.9969    | 0.9989 | 0.999  | 0.9965    | 0.9984 | 0.9988 | 0.996     | 0.9982 | 0.9987 |
|       | EN 0.025 min | 0.9897    | 0.9932 | 0.9947 | 0.9865    | 0.9907 | 0.9935 | 0.9853    | 0.9891 | 0.9918 | 0.9838    | 0.9877 | 0.9911 | 0.9826    | 0.9866 | 0.9902 |
|       | EN 0.025 1se | 0.9984    | 0.9994 | 0.9995 | 0.9964    | 0.9986 | 0.9988 | 0.9949    | 0.9979 | 0.9982 | 0.994     | 0.9972 | 0.9978 | 0.9933    | 0.9966 | 0.9972 |
|       | zellner      | 0.9997    | 0.9999 | 0.9999 | 0.9996    | 0.9999 | 0.9999 | 0.9996    | 0.9998 | 0.9999 | 0.9996    | 0.9999 | 0.9999 | 0.9996    | 0.9998 | 0.9998 |
|       | pMOM         | 0.9997    | 0.9999 | 0.9999 | 0.9996    | 0.9999 | 0.9999 | 0.9996    | 0.9999 | 0.9999 | 0.9996    | 0.9999 | 0.9999 | 0.9996    | 0.9999 | 0.9998 |
| piMOM | 0.9997       | 0.9998    | 0.9999 | 0.9996 | 0.9998    | 0.9999 | 0.9995 | 0.9998    | 0.9999 | 0.9995 | 0.9998    | 0.9998 | 0.9995 | 0.9998    | 0.9998 |        |

Supplementary Table 4: Mean squared error (MSE) for Simulation 1 datasets with number of real genotyped SNPs  $p = (10000, 15000, 2000)$ , sample size  $n = (2000, 3000, 5000)$ , and heritability  $h^2 = (0.1, 0.2, 0.3, 0.4, 0.5)$ , analyzed using GWASinlps pMOM method ( $\tau = 0.022$ ,  $k_0 = 1$ ,  $r_{xx} = 0.2$ ), GWASinlps piMOM method ( $\tau = 0.008$ ,  $k_0 = 1$ ,  $r_{xx} = 0.2$ ), Zellner’s g-prior based method within our structured screen-and-select framework, LASSO ( $\lambda = 1.1se$ ), Elastic Net ( $\lambda = 1.1se$ ,  $\alpha = 0.75, 0.5, 0.25$ ), and pi-MASS. For GWASinlps SNP selection, 1,800 MCMC iterations were used after 200 burn-ins, whereas for pi-MASS 10,000 iterations were used after 1,000 burn-ins. For Zellner prior  $g = n$  was used. All the figures are averaged over 100 replicates.

|       |              | $h^2=0.1$ |         |         | $h^2=0.2$ |        |        | $h^2=0.3$ |        |        | $h^2=0.4$ |        |        | $h^2=0.5$ |        |        |
|-------|--------------|-----------|---------|---------|-----------|--------|--------|-----------|--------|--------|-----------|--------|--------|-----------|--------|--------|
|       |              | n=2K      | n=3K    | n=5K    | n=2K      | n=3K   | n=5K   | n=2K      | n=3K   | n=5K   | n=2K      | n=3K   | n=5K   | n=2K      | n=3K   | n=5K   |
| p=10K | pi-MASS      | 94.715    | 101.752 | 98.529  | 48.884    | 53.175 | 51.306 | 34.054    | 37.439 | 36.103 | 27.147    | 29.742 | 28.577 | 23.381    | 26.195 | 24.043 |
|       | LASSO min    | 80.986    | 87.265  | 83.412  | 35.606    | 38.330 | 36.824 | 20.637    | 22.317 | 21.298 | 13.191    | 14.095 | 13.519 | 8.807     | 9.445  | 9.062  |
|       | LASSO 1se    | 87.941    | 95.591  | 91.973  | 39.392    | 42.519 | 40.926 | 22.869    | 24.927 | 23.894 | 14.664    | 15.967 | 15.322 | 9.746     | 10.627 | 10.274 |
|       | EN 0.075 min | 80.963    | 86.966  | 84.204  | 35.538    | 38.007 | 36.649 | 20.604    | 22.020 | 21.206 | 13.187    | 14.146 | 13.587 | 8.777     | 9.388  | 9.039  |
|       | EN 0.075 1se | 88.488    | 95.714  | 91.602  | 39.510    | 42.711 | 41.180 | 22.911    | 24.833 | 23.912 | 14.637    | 15.912 | 15.388 | 9.758     | 10.603 | 10.292 |
|       | EN 0.050 min | 81.001    | 86.859  | 83.580  | 35.655    | 38.091 | 36.726 | 20.585    | 22.185 | 21.108 | 13.114    | 14.066 | 13.483 | 8.706     | 9.329  | 8.949  |
|       | EN 0.050 1se | 88.554    | 95.729  | 92.000  | 39.432    | 42.565 | 40.988 | 22.929    | 24.988 | 23.997 | 14.749    | 15.928 | 15.490 | 9.757     | 10.618 | 10.276 |
|       | EN 0.025 min | 80.426    | 87.208  | 83.728  | 35.377    | 38.076 | 36.693 | 20.484    | 21.897 | 20.931 | 12.997    | 13.943 | 13.400 | 8.672     | 9.264  | 8.796  |
|       | EN 0.025 1se | 88.522    | 95.394  | 92.479  | 39.480    | 42.666 | 41.402 | 23.024    | 25.015 | 24.229 | 14.770    | 16.074 | 15.508 | 9.863     | 10.702 | 10.409 |
|       | zellner      | 88.378    | 104.353 | 100.418 | 38.684    | 43.561 | 41.476 | 22.209    | 24.232 | 23.249 | 14.214    | 15.540 | 14.719 | 9.488     | 10.240 | 9.710  |
| pMOM  | 83.200       | 89.907    | 85.449  | 36.909  | 39.326    | 37.651 | 21.362 | 22.766    | 21.847 | 13.646 | 14.594    | 13.958 | 9.066  | 9.727     | 9.269  |        |
| piMOM | 82.788       | 89.598    | 85.385  | 36.872  | 39.225    | 37.480 | 21.333 | 22.703    | 21.740 | 13.512 | 14.516    | 13.868 | 9.031  | 9.676     | 9.223  |        |
| p=15K | pi-MASS      | 103.041   | 101.511 | 96.673  | 52.577    | 52.975 | 49.734 | 36.297    | 37.453 | 34.577 | 28.366    | 30.484 | 27.396 | 24.199    | 26.207 | 23.421 |
|       | LASSO min    | 90.946    | 87.935  | 84.587  | 40.222    | 38.732 | 37.350 | 23.373    | 22.548 | 21.760 | 15.036    | 14.439 | 13.848 | 9.997     | 9.584  | 9.223  |
|       | LASSO 1se    | 96.218    | 94.226  | 90.663  | 42.862    | 41.943 | 40.310 | 25.065    | 24.448 | 23.579 | 16.088    | 15.767 | 15.177 | 10.760    | 10.470 | 10.105 |
|       | EN 0.075 min | 91.170    | 87.928  | 84.195  | 40.245    | 38.895 | 37.299 | 23.309    | 22.465 | 21.611 | 14.962    | 14.403 | 13.812 | 9.971     | 9.569  | 9.225  |
|       | EN 0.075 1se | 96.502    | 94.514  | 90.731  | 42.973    | 41.962 | 40.468 | 25.048    | 24.480 | 23.550 | 16.113    | 15.700 | 15.110 | 10.735    | 10.455 | 10.103 |
|       | EN 0.050 min | 90.760    | 87.881  | 84.034  | 40.188    | 38.522 | 37.117 | 23.257    | 22.447 | 21.557 | 14.951    | 14.342 | 13.860 | 9.919     | 9.565  | 9.161  |
|       | EN 0.050 1se | 96.814    | 94.159  | 90.763  | 42.978    | 42.114 | 40.573 | 25.117    | 24.498 | 23.653 | 16.129    | 15.737 | 15.158 | 10.769    | 10.452 | 10.145 |
|       | EN 0.025 min | 90.590    | 87.518  | 83.940  | 40.122    | 38.546 | 37.066 | 23.179    | 22.392 | 21.396 | 14.959    | 14.309 | 13.684 | 9.945     | 9.442  | 9.033  |
|       | EN 0.025 1se | 96.725    | 94.571  | 90.997  | 43.071    | 41.996 | 40.614 | 25.133    | 24.605 | 23.692 | 16.179    | 15.819 | 15.285 | 10.828    | 10.570 | 10.165 |
|       | zellner      | 96.218    | 99.701  | 92.057  | 42.356    | 41.724 | 39.232 | 24.356    | 23.783 | 22.865 | 15.667    | 15.432 | 14.634 | 10.385    | 10.192 | 9.718  |
| pMOM  | 92.713       | 90.028    | 86.385  | 41.091  | 39.816    | 37.955 | 23.849 | 23.061    | 22.047 | 15.276 | 14.740    | 14.121 | 10.216 | 9.811     | 9.418  |        |
| piMOM | 92.572       | 89.763    | 85.928  | 40.961  | 39.573    | 37.746 | 23.760 | 23.007    | 21.951 | 15.258 | 14.676    | 14.052 | 10.155 | 9.793     | 9.384  |        |
| p=20K | pi-MASS      | 95.432    | 91.162  | 90.292  | 49.810    | 47.339 | 46.551 | 36.005    | 32.688 | 32.457 | 29.056    | 25.919 | 25.875 | 26.580    | 22.080 | 22.163 |
|       | LASSO min    | 82.745    | 78.724  | 79.759  | 36.681    | 34.860 | 35.334 | 21.364    | 20.318 | 20.537 | 13.705    | 13.032 | 13.214 | 9.134     | 8.668  | 8.800  |
|       | LASSO 1se    | 86.737    | 82.970  | 84.137  | 38.608    | 36.990 | 37.443 | 22.424    | 21.581 | 21.811 | 14.405    | 13.854 | 14.025 | 9.625     | 9.216  | 9.340  |
|       | EN 0.075 min | 82.679    | 78.606  | 79.631  | 36.560    | 34.843 | 35.391 | 21.330    | 20.297 | 20.536 | 13.728    | 13.021 | 13.194 | 9.126     | 8.658  | 8.774  |
|       | EN 0.075 1se | 86.807    | 83.125  | 83.961  | 38.559    | 36.985 | 37.374 | 22.475    | 21.549 | 21.783 | 14.463    | 13.838 | 13.978 | 9.621     | 9.236  | 9.333  |
|       | EN 0.050 min | 82.581    | 78.817  | 79.689  | 36.527    | 34.720 | 35.326 | 21.341    | 20.168 | 20.550 | 13.711    | 12.978 | 13.124 | 9.103     | 8.665  | 8.776  |
|       | EN 0.050 1se | 86.876    | 83.145  | 84.206  | 38.639    | 37.010 | 37.392 | 22.547    | 21.597 | 21.831 | 14.467    | 13.850 | 14.042 | 9.636     | 9.252  | 9.359  |
|       | EN 0.025 min | 82.465    | 78.729  | 79.541  | 36.489    | 34.704 | 35.192 | 21.285    | 20.195 | 20.396 | 13.674    | 12.923 | 13.090 | 9.094     | 8.615  | 8.686  |
|       | EN 0.025 1se | 87.140    | 83.333  | 84.370  | 38.677    | 37.057 | 37.603 | 22.542    | 21.725 | 21.913 | 14.501    | 13.977 | 14.137 | 9.658     | 9.294  | 9.388  |
|       | zellner      | 86.646    | 82.735  | 83.123  | 37.772    | 36.133 | 36.457 | 21.926    | 21.027 | 21.147 | 14.046    | 13.561 | 13.585 | 9.394     | 8.976  | 9.004  |
| pMOM  | 84.429       | 80.277    | 81.116  | 37.300  | 35.512    | 35.841 | 21.708 | 20.649    | 20.892 | 13.945 | 13.282    | 13.403 | 9.285  | 8.861     | 8.924  |        |
| piMOM | 84.195       | 80.137    | 80.705  | 37.243  | 35.448    | 35.774 | 21.665 | 20.621    | 20.858 | 13.933 | 13.277    | 13.367 | 9.272  | 8.823     | 8.894  |        |

Supplementary Table 5:  $l_1$  estimation error in effect sizes ( $\beta$ -error) for Simulation 1 datasets with number of real genotyped SNPs  $p = (10000, 15000, 2000)$ , sample size  $n = (2000, 3000, 5000)$ , and heritability  $h^2 = (0.1, 0.2, 0.3, 0.4, 0.5)$ , analyzed using GWASinlps pMOM method ( $\tau = 0.022$ ,  $k_0 = 1$ ,  $r_{xx} = 0.2$ ), GWASinlps piMOM method ( $\tau = 0.008$ ,  $k_0 = 1$ ,  $r_{xx} = 0.2$ ), Zellner’s g-prior based method within our structured screen-and-select framework, LASSO ( $\lambda = 1.1se$ ), Elastic Net ( $\lambda = 1.1se$ ,  $\alpha = 0.75, 0.5, 0.25$ ), and pi-MASS. For GWASinlps SNP selection, 1,800 MCMC iterations were used after 200 burn-ins, whereas for pi-MASS 10,000 iterations were used after 1,000 burn-ins. For Zellner prior  $g = n$  was used. All the figures are averaged over 100 replicates.

|       |              | $h^2=0.1$ |       |       | $h^2=0.2$ |       |       | $h^2=0.3$ |       |       | $h^2=0.4$ |       |       | $h^2=0.5$ |       |       |
|-------|--------------|-----------|-------|-------|-----------|-------|-------|-----------|-------|-------|-----------|-------|-------|-----------|-------|-------|
|       |              | n=2K      | n=3K  | n=5K  |
| p=10K | pi-MASS      | 4.502     | 4.502 | 4.479 | 4.726     | 4.706 | 4.605 | 4.894     | 4.950 | 4.864 | 5.145     | 5.073 | 5.005 | 5.310     | 5.311 | 5.181 |
|       | LASSO min    | 3.407     | 3.354 | 3.207 | 2.734     | 2.614 | 2.516 | 2.303     | 2.161 | 2.107 | 2.009     | 1.830 | 1.823 | 1.758     | 1.539 | 1.542 |
|       | LASSO 1se    | 3.809     | 3.807 | 3.804 | 2.976     | 2.916 | 2.824 | 2.494     | 2.366 | 2.315 | 2.153     | 2.010 | 1.946 | 1.889     | 1.674 | 1.644 |
|       | EN 0.075 min | 3.442     | 3.378 | 3.247 | 2.778     | 2.650 | 2.553 | 2.374     | 2.217 | 2.161 | 2.048     | 1.878 | 1.868 | 1.785     | 1.592 | 1.608 |
|       | EN 0.075 1se | 3.841     | 3.844 | 3.772 | 3.008     | 2.944 | 2.866 | 2.528     | 2.433 | 2.375 | 2.229     | 2.040 | 2.009 | 1.942     | 1.730 | 1.725 |
|       | EN 0.050 min | 3.481     | 3.416 | 3.291 | 2.863     | 2.739 | 2.661 | 2.468     | 2.336 | 2.287 | 2.174     | 2.018 | 2.007 | 1.943     | 1.751 | 1.754 |
|       | EN 0.050 1se | 3.862     | 3.857 | 3.863 | 3.070     | 3.024 | 2.958 | 2.643     | 2.533 | 2.508 | 2.345     | 2.185 | 2.170 | 2.114     | 1.903 | 1.908 |
|       | EN 0.025 min | 3.547     | 3.529 | 3.437 | 3.078     | 2.954 | 2.894 | 2.775     | 2.656 | 2.582 | 2.553     | 2.396 | 2.346 | 2.367     | 2.175 | 2.146 |
|       | EN 0.025 1se | 3.943     | 3.931 | 3.933 | 3.310     | 3.217 | 3.182 | 2.993     | 2.858 | 2.806 | 2.749     | 2.568 | 2.520 | 2.564     | 2.350 | 2.308 |
|       | zellner      | 3.783     | 3.690 | 3.326 | 3.118     | 2.605 | 2.548 | 2.674     | 2.040 | 2.099 | 2.055     | 1.479 | 1.681 | 1.707     | 1.024 | 1.217 |
|       | pMOM         | 4.172     | 4.225 | 3.742 | 3.225     | 2.928 | 2.844 | 2.672     | 2.230 | 2.229 | 2.087     | 1.609 | 1.766 | 1.776     | 1.107 | 1.356 |
| piMOM | 4.100        | 4.095     | 3.740 | 3.109 | 2.828     | 2.798 | 2.519 | 2.158     | 2.183 | 2.007 | 1.563     | 1.737 | 1.636 | 1.107     | 1.313 |       |
| p=15K | pi-MASS      | 4.436     | 4.537 | 4.477 | 4.500     | 4.756 | 4.621 | 4.571     | 4.997 | 4.774 | 4.670     | 5.130 | 4.917 | 4.784     | 5.374 | 5.089 |
|       | LASSO min    | 3.331     | 2.793 | 2.990 | 2.766     | 2.112 | 2.317 | 2.463     | 1.690 | 1.933 | 2.240     | 1.401 | 1.629 | 1.983     | 1.160 | 1.376 |
|       | LASSO 1se    | 3.667     | 3.354 | 3.470 | 2.881     | 2.425 | 2.563 | 2.518     | 1.925 | 2.099 | 2.268     | 1.589 | 1.756 | 2.024     | 1.324 | 1.496 |
|       | EN 0.075 min | 3.391     | 2.829 | 3.018 | 2.860     | 2.153 | 2.361 | 2.583     | 1.763 | 1.981 | 2.334     | 1.465 | 1.697 | 2.161     | 1.229 | 1.465 |
|       | EN 0.075 1se | 3.664     | 3.368 | 3.471 | 3.029     | 2.434 | 2.582 | 2.697     | 1.964 | 2.134 | 2.453     | 1.637 | 1.825 | 2.259     | 1.386 | 1.574 |
|       | EN 0.050 min | 3.482     | 2.897 | 3.074 | 3.033     | 2.252 | 2.455 | 2.800     | 1.884 | 2.099 | 2.613     | 1.612 | 1.844 | 2.456     | 1.386 | 1.617 |
|       | EN 0.050 1se | 3.733     | 3.326 | 3.478 | 3.216     | 2.551 | 2.691 | 2.952     | 2.087 | 2.286 | 2.769     | 1.783 | 1.986 | 2.617     | 1.530 | 1.747 |
|       | EN 0.025 min | 3.637     | 3.062 | 3.220 | 3.310     | 2.525 | 2.697 | 3.122     | 2.211 | 2.409 | 2.980     | 1.989 | 2.194 | 2.859     | 1.796 | 2.004 |
|       | EN 0.025 1se | 3.838     | 3.497 | 3.587 | 3.461     | 2.782 | 2.962 | 3.273     | 2.424 | 2.609 | 3.120     | 2.179 | 2.365 | 3.004     | 1.983 | 2.156 |
|       | zellner      | 3.853     | 2.838 | 3.127 | 3.094     | 1.994 | 2.345 | 2.684     | 1.495 | 1.814 | 2.334     | 1.102 | 1.415 | 2.068     | 0.780 | 1.109 |
|       | pMOM         | 4.053     | 3.203 | 3.453 | 3.190     | 2.153 | 2.433 | 2.730     | 1.517 | 1.895 | 2.432     | 1.203 | 1.422 | 2.129     | 0.861 | 1.125 |
| piMOM | 3.937        | 3.180     | 3.417 | 3.116 | 2.101     | 2.371 | 2.586 | 1.542     | 1.855 | 2.407 | 1.196     | 1.467 | 2.103 | 0.834     | 1.135 |       |
| p=20K | pi-MASS      | 4.543     | 4.511 | 4.510 | 4.700     | 4.652 | 4.699 | 4.874     | 4.780 | 4.860 | 5.018     | 4.922 | 5.009 | 5.257     | 5.068 | 5.150 |
|       | LASSO min    | 2.813     | 2.406 | 2.511 | 2.263     | 1.773 | 1.846 | 1.997     | 1.429 | 1.462 | 1.788     | 1.176 | 1.197 | 1.606     | 0.981 | 0.989 |
|       | LASSO 1se    | 3.077     | 2.860 | 2.970 | 2.369     | 2.075 | 2.153 | 2.045     | 1.637 | 1.666 | 1.834     | 1.325 | 1.370 | 1.627     | 1.101 | 1.130 |
|       | EN 0.075 min | 2.978     | 2.440 | 2.558 | 2.561     | 1.818 | 1.900 | 2.348     | 1.481 | 1.526 | 2.193     | 1.236 | 1.267 | 2.064     | 1.043 | 1.059 |
|       | EN 0.075 1se | 3.223     | 2.868 | 3.018 | 2.685     | 2.094 | 2.196 | 2.435     | 1.656 | 1.741 | 2.262     | 1.377 | 1.435 | 2.142     | 1.140 | 1.205 |
|       | EN 0.050 min | 3.089     | 2.494 | 2.649 | 2.694     | 1.923 | 2.013 | 2.500     | 1.596 | 1.666 | 2.362     | 1.361 | 1.418 | 2.245     | 1.171 | 1.218 |
|       | EN 0.050 1se | 3.337     | 2.964 | 3.072 | 2.848     | 2.187 | 2.309 | 2.624     | 1.784 | 1.890 | 2.459     | 1.516 | 1.624 | 2.344     | 1.308 | 1.399 |
|       | EN 0.025 min | 3.218     | 2.687 | 2.853 | 2.886     | 2.187 | 2.324 | 2.726     | 1.925 | 2.042 | 2.612     | 1.731 | 1.828 | 2.516     | 1.565 | 1.652 |
|       | EN 0.025 1se | 3.480     | 3.096 | 3.215 | 3.071     | 2.477 | 2.605 | 2.892     | 2.160 | 2.279 | 2.754     | 1.928 | 2.042 | 2.655     | 1.745 | 1.843 |
|       | zellner      | 2.829     | 2.239 | 2.344 | 2.316     | 1.414 | 1.500 | 2.141     | 1.015 | 1.000 | 1.931     | 0.772 | 0.816 | 1.733     | 0.649 | 0.572 |
|       | pMOM         | 3.025     | 2.373 | 2.470 | 2.379     | 1.447 | 1.553 | 2.172     | 1.054 | 1.025 | 1.914     | 0.811 | 0.827 | 1.810     | 0.700 | 0.645 |
| piMOM | 2.996        | 2.392     | 2.464 | 2.338 | 1.433     | 1.516 | 2.120 | 1.051     | 1.009 | 1.964 | 0.823     | 0.798 | 1.793 | 0.665     | 0.612 |       |

Supplementary Table 6: True positive rate (TPR), true negative rate (TNR), and false discovery rate (FDR) for Simulation 2 datasets with number of real genotyped SNPs  $p \sim 8000$ , sample size  $n=(1000, 1500, 2000, 2500, 3000, 3500, 4000, 4500, 5000, 5500, 6000, 6500, 7000, 7500, 8000, 8500, 9000, 9500, 10000)$ , and heritability  $h^2 = (0.1, 0.2, 0.3, 0.4, 0.5)$ , analyzed using GWASinlps pMOM method ( $\tau = 0.022$ ,  $k_0 = 1$ ,  $r_{xx} = 0.2$ ). For GWASinlps SNP selection, 1,800 MCMC iterations were used after 200 burn-ins. All the figures are averaged over 100 replicates.

|          | TPR        |           |            | TNR        |           |            | FDR        |           |            |
|----------|------------|-----------|------------|------------|-----------|------------|------------|-----------|------------|
|          | $h^2=0.05$ | $h^2=0.1$ | $h^2=0.15$ | $h^2=0.05$ | $h^2=0.1$ | $h^2=0.15$ | $h^2=0.05$ | $h^2=0.1$ | $h^2=0.15$ |
| $n=1K$   | 0.0288     | 0.0864    | 0.1392     | 0.9321     | 0.8367    | 0.7494     | 0.9987     | 0.9985    | 0.9986     |
| $n=1.5K$ | 0.0444     | 0.1292    | 0.2068     | 0.8653     | 0.693     | 0.6092     | 0.9991     | 0.999     | 0.999      |
| $n=2K$   | 0.0676     | 0.1824    | 0.2748     | 0.7548     | 0.5665    | 0.4799     | 0.9993     | 0.9992    | 0.9992     |
| $n=2.5K$ | 0.0904     | 0.218     | 0.3212     | 0.6263     | 0.4256    | 0.3702     | 0.9995     | 0.9994    | 0.9994     |
| $n=3K$   | 0.1084     | 0.2352    | 0.3452     | 0.5537     | 0.4197    | 0.3065     | 0.9995     | 0.9994    | 0.9995     |
| $n=3.5K$ | 0.1324     | 0.2576    | 0.3672     | 0.453      | 0.359     | 0.271      | 0.9996     | 0.9995    | 0.9996     |
| $n=4K$   | 0.158      | 0.2976    | 0.4116     | 0.4049     | 0.2816    | 0.2349     | 0.9996     | 0.9996    | 0.9996     |
| $n=4.5K$ | 0.1712     | 0.336     | 0.4324     | 0.3793     | 0.2648    | 0.2213     | 0.9996     | 0.9996    | 0.9996     |
| $n=5K$   | 0.2012     | 0.3756    | 0.4612     | 0.3229     | 0.2004    | 0.1586     | 0.9997     | 0.9997    | 0.9997     |
| $n=5.5K$ | 0.1992     | 0.3696    | 0.4636     | 0.3257     | 0.212     | 0.1544     | 0.9997     | 0.9997    | 0.9997     |
| $n=6K$   | 0.2164     | 0.3916    | 0.4768     | 0.3171     | 0.1998    | 0.171      | 0.9997     | 0.9997    | 0.9997     |
| $n=6.5K$ | 0.2412     | 0.3948    | 0.4852     | 0.2401     | 0.1725    | 0.1236     | 0.9997     | 0.9997    | 0.9998     |
| $n=7K$   | 0.2416     | 0.4032    | 0.4952     | 0.2434     | 0.1592    | 0.1235     | 0.9997     | 0.9997    | 0.9998     |
| $n=7.5K$ | 0.2812     | 0.4348    | 0.4972     | 0.1996     | 0.1565    | 0.1233     | 0.9998     | 0.9997    | 0.9998     |
| $n=8K$   | 0.272      | 0.4396    | 0.5108     | 0.2371     | 0.1412    | 0.1037     | 0.9997     | 0.9998    | 0.9998     |
| $n=8.5K$ | 0.306      | 0.4596    | 0.53       | 0.1952     | 0.1133    | 0.0949     | 0.9997     | 0.9998    | 0.9998     |
| $n=9K$   | 0.3136     | 0.4656    | 0.5376     | 0.1807     | 0.139     | 0.1027     | 0.9998     | 0.9998    | 0.9998     |
| $n=9.5K$ | 0.2876     | 0.4624    | 0.5412     | 0.2191     | 0.1231    | 0.1084     | 0.9997     | 0.9998    | 0.9998     |
| $n=10K$  | 0.324      | 0.474     | 0.5532     | 0.1727     | 0.1057    | 0.083      | 0.9998     | 0.9998    | 0.9998     |

Supplementary Table 7: Relative prediction gain (RPG) in train data (three-quarter of samples) and test data for Simulation 2 datasets with number of real genotyped SNPs  $p \sim 8000$ , sample size  $n=(1000, 1500, 2000, 2500, 3000, 3500, 4000, 4500, 5000, 5500, 6000, 6500, 7000, 7500, 8000, 8500, 9000, 9500, 10000)$ , and heritability  $h^2 = (0.1, 0.2, 0.3, 0.4, 0.5)$ , analyzed using GWASinlps pMOM method ( $\tau = 0.022$ ,  $k_0 = 1$ ,  $r_{xx} = 0.2$ ). For GWASinlps SNP selection, 1,800 MCMC iterations were used after 200 burn-ins. All the figures are averaged over 100 replicates.

|          | RPG train  |           |            | RPG test   |           |            |
|----------|------------|-----------|------------|------------|-----------|------------|
|          | $h^2=0.05$ | $h^2=0.1$ | $h^2=0.15$ | $h^2=0.05$ | $h^2=0.1$ | $h^2=0.15$ |
| $n=1K$   | 2.8594     | 1.9193    | 1.5057     | 1.2865     | 0.7461    | 0.7958     |
| $n=1.5K$ | 1.661      | 1.2654    | 1.1547     | 0.8773     | 0.6071    | 0.7029     |
| $n=2K$   | 1.0441     | 1.0572    | 1.0292     | 0.3713     | 0.5826    | 0.7551     |
| $n=2.5K$ | 0.5375     | 0.9128    | 0.9752     | -0.1814    | 0.6235    | 0.7842     |
| $n=3K$   | 0.7171     | 0.9197    | 0.9436     | 0.3283     | 0.6543    | 0.7964     |
| $n=3.5K$ | 0.5808     | 0.8826    | 0.9421     | 0.3432     | 0.6881    | 0.8248     |
| $n=4K$   | 0.7196     | 0.853     | 0.9622     | 0.4367     | 0.7103    | 0.8949     |
| $n=4.5K$ | 0.6775     | 0.8795    | 0.9514     | 0.44       | 0.7547    | 0.894      |
| $n=5K$   | 0.7139     | 0.9144    | 0.9523     | 0.488      | 0.818     | 0.9035     |
| $n=5.5K$ | 0.7227     | 0.9001    | 0.9501     | 0.553      | 0.8295    | 0.9163     |
| $n=6K$   | 0.6915     | 0.9123    | 0.9496     | 0.549      | 0.8447    | 0.9169     |
| $n=6.5K$ | 0.6493     | 0.8941    | 0.9446     | 0.4992     | 0.8332    | 0.9232     |
| $n=7K$   | 0.6061     | 0.864     | 0.9463     | 0.4654     | 0.8261    | 0.9174     |
| $n=7.5K$ | 0.7413     | 0.9114    | 0.93       | 0.6226     | 0.8674    | 0.916      |
| $n=8K$   | 0.7364     | 0.9153    | 0.9483     | 0.6071     | 0.8849    | 0.9272     |
| $n=8.5K$ | 0.7911     | 0.9203    | 0.9429     | 0.6642     | 0.9002    | 0.9375     |
| $n=9K$   | 0.792      | 0.9387    | 0.9596     | 0.6999     | 0.9026    | 0.9457     |
| $n=9.5K$ | 0.719      | 0.916     | 0.9574     | 0.6319     | 0.8989    | 0.942      |
| $n=10K$  | 0.7777     | 0.914     | 0.9443     | 0.6929     | 0.9026    | 0.9501     |



Supplementary Table 8: Mean squared error (MSE) from the sensitivity analysis of GWASinlps tuning parameters  $k_0$ ,  $r_{xx}$ , and  $n_{skip}$  using the first 30 replicates of the Simulation 1 dataset with number of real genotyped SNPs  $p = 10000$ , sample size  $n = 2000$ , and heritability  $h^2 = 0.5$ , analyzed using GWASinlps pMOM method ( $\tau = 0.022$ ,  $k_0 = 1, 2, 3, 4, 5$ ,  $r_{xx} = 0.2, 0.35, 0.5, 0.75, 0.9$ ,  $n_{skip} = 1, 2, 3, 4, 5$ ). For GWASinlps SNP selection, 1,800 MCMC iterations were used after 200 burn-ins. All the figures are averaged over the 30 replicates.

| $n_{skip}=1$ |              |               |              |               |              | $n_{skip}=2$ |              |               |              |               |              |
|--------------|--------------|---------------|--------------|---------------|--------------|--------------|--------------|---------------|--------------|---------------|--------------|
|              | $r_{xx}=0.2$ | $r_{xx}=0.35$ | $r_{xx}=0.5$ | $r_{xx}=0.75$ | $r_{xx}=0.9$ |              | $r_{xx}=0.2$ | $r_{xx}=0.35$ | $r_{xx}=0.5$ | $r_{xx}=0.75$ | $r_{xx}=0.9$ |
| $k_0=1$      | 9.151        | 9.1           | 9.04         | 8.952         | 8.64         | $k_0=1$      | 9.126        | 9.058         | 8.981        | 8.838         | 8.555        |
| $k_0=2$      | 9.101        | 9.029         | 8.928        | 8.711         | 8.485        | $k_0=2$      | 9.084        | 8.973         | 8.87         | 8.615         | 8.351        |
| $k_0=3$      | 9.076        | 8.936         | 8.801        | 8.55          | 8.36         | $k_0=3$      | 9.044        | 8.91          | 8.769        | 8.485         | 8.306        |
| $k_0=4$      | 9.059        | 8.92          | 8.823        | 8.541         | 8.307        | $k_0=4$      | 9.035        | 8.876         | 8.775        | 8.501         | 8.294        |
| $k_0=5$      | 8.989        | 8.864         | 8.784        | 8.489         | 8.242        | $k_0=5$      | 8.969        | 8.83          | 8.729        | 8.441         | 8.237        |

  

| $n_{skip}=3$ |              |               |              |               |              | $n_{skip}=4$ |              |               |              |               |              |
|--------------|--------------|---------------|--------------|---------------|--------------|--------------|--------------|---------------|--------------|---------------|--------------|
|              | $r_{xx}=0.2$ | $r_{xx}=0.35$ | $r_{xx}=0.5$ | $r_{xx}=0.75$ | $r_{xx}=0.9$ |              | $r_{xx}=0.2$ | $r_{xx}=0.35$ | $r_{xx}=0.5$ | $r_{xx}=0.75$ | $r_{xx}=0.9$ |
| $k_0=1$      | 9.104        | 9.015         | 8.942        | 8.74          | 8.483        | $k_0=1$      | 9.092        | 8.992         | 8.904        | 8.686         | 8.432        |
| $k_0=2$      | 9.07         | 8.947         | 8.816        | 8.565         | 8.327        | $k_0=2$      | 9.063        | 8.93          | 8.796        | 8.522         | 8.316        |
| $k_0=3$      | 9.032        | 8.884         | 8.753        | 8.462         | 8.3          | $k_0=3$      | 9.029        | 8.879         | 8.74         | 8.445         | 8.3          |
| $k_0=4$      | 9.025        | 8.865         | 8.759        | 8.498         | 8.289        | $k_0=4$      | 9.025        | 8.86          | 8.748        | 8.494         | 8.288        |
| $k_0=5$      | 8.965        | 8.819         | 8.717        | 8.439         | 8.233        | $k_0=5$      | 8.965        | 8.817         | 8.712        | 8.435         | 8.233        |

  

| $n_{skip}=5$ |              |               |              |               |              |
|--------------|--------------|---------------|--------------|---------------|--------------|
|              | $r_{xx}=0.2$ | $r_{xx}=0.35$ | $r_{xx}=0.5$ | $r_{xx}=0.75$ | $r_{xx}=0.9$ |
| $k_0=1$      | 9.089        | 8.976         | 8.883        | 8.648         | 8.381        |
| $k_0=2$      | 9.063        | 8.918         | 8.781        | 8.503         | 8.313        |
| $k_0=3$      | 9.025        | 8.873         | 8.733        | 8.446         | 8.295        |
| $k_0=4$      | 9.022        | 8.853         | 8.746        | 8.486         | 8.288        |
| $k_0=5$      | 8.965        | 8.817         | 8.711        | 8.433         | 8.231        |

Supplementary Table 9: Chromosome numbers and base pair ids (Chrom:pos), frequency of appearance in the 20 SNP sets (freq), reference SNP ids (rs ID), and gene symbols (Gene) for the 14 GWASinlps pMOM selected SNPs from the TOP data.

| Chrom:pos   | freq | rs ID             | gene          |
|-------------|------|-------------------|---------------|
| 16:24018670 | 17   | <i>rs4788421</i>  | <i>PRKCB</i>  |
| 1:58331857  | 16   | <i>rs12078749</i> | <i>DAB1</i>   |
| 1:94509224  | 15   | <i>rs4847272</i>  | <i>ABCA4</i>  |
| 3:114393973 | 15   | <i>rs9850975</i>  | <i>ZBTB20</i> |
| 8:129030687 | 15   | <i>rs17199763</i> | <i>MYC</i>    |
| 1:58609441  | 14   | <i>rs17491825</i> | <i>DAB1</i>   |
| 1:217022081 | 12   | <i>rs12083048</i> | <i>ESRRG</i>  |
| 11:83194086 | 9    | <i>rs1975119</i>  | <i>DLG2</i>   |
| 5:64247018  | 9    | <i>rs1433599</i>  | <i>CWC27</i>  |
| 7:43836596  | 9    | <i>rs2158952</i>  | <i>BLVRA</i>  |
| 8:133225904 | 9    | <i>rs10092161</i> | <i>KCNQ3</i>  |
| 11:84626915 | 7    | <i>rs11828539</i> | <i>DLG2</i>   |
| 14:30147686 | 7    | <i>rs6571318</i>  | <i>PRKD1</i>  |
| 3:105464766 | 7    | <i>rs9657906</i>  | <i>CBLB</i>   |
| 1:10591104  | 6    | <i>rs12090079</i> | <i>PEX14</i>  |
| 4:114472389 | 6    | <i>rs17446851</i> | <i>CAMK2D</i> |
| 4:144353246 | 6    | <i>rs7695623</i>  | <i>GAB1</i>   |
| 8:27181903  | 6    | <i>rs17057011</i> | <i>PTK2B</i>  |
| 10:21471450 | 5    | <i>rs11012563</i> | <i>NEBL</i>   |
| 11:70901471 | 5    | <i>rs3934692</i>  | <i>SHANK2</i> |
| 1:236886531 | 5    | <i>rs2914919</i>  | <i>ACTN2</i>  |
| 1:68378001  | 5    | <i>rs12730964</i> | <i>GNG12</i>  |
| 3:60271645  | 5    | <i>rs2201649</i>  | <i>FHIT</i>   |
| 6:161154955 | 5    | <i>rs1317026</i>  | <i>PLG</i>    |
| 8:27389167  | 5    | <i>rs17057312</i> | <i>EPHX2</i>  |
| 8:3964918   | 5    | <i>rs17332636</i> | <i>CSMD1</i>  |

## Supplementary Web Resources

HapMap 3: [https://mathgen.stats.ox.ac.uk/impute/impute\\_v1.html#Using\\_IMPUTE\\_with\\_the\\_HapMap\\_Data](https://mathgen.stats.ox.ac.uk/impute/impute_v1.html#Using_IMPUTE_with_the_HapMap_Data)

EIGENSOFT: <https://www.hsph.harvard.edu/alkes-price/software/>

TOP: <http://www.med.uio.no/klinmed/english/about/organization/divisions/mental-health-addiction/psychosis-research-centre-top/>
